# Supplementary material for: Phylogenetic Characteristics of Canine Parvovirus Type 2c Variant Endemic in Shanghai, China
Source: MDPI journal article supplement (doi:10.3390/v13112257), 2021-11-10
Supplement: s1 [file s1]

**Table S1. Primers used for the amplification of CPV-VP2 gene**

| Name   | Sequence (5'-3')          | Product (bp) | Position (nt) <sup>a</sup> |
|--------|---------------------------|--------------|----------------------------|
| VP2-F1 | AGAGACAATCTTGCACCAAT      | 1068         | 2766-3832                  |
| VP2-R1 | TGTGTAGACGCCTCAAAAGAATAAT |              |                            |
| VP2-F2 | GAACAGGTGATGAATTTGCTACAGG | 1209         | 3550-4758                  |
| VP2-R2 | CAACCACCCACACCATAAC       |              |                            |

<sup>a</sup> Oligonucleotide positions are referred to the genomic sequences of CPV-2c strain (accession number:MG013488)

**Table S2. Primers used for the amplify the near full-length sequence of CPV-2**

| Name   | Sequence (5'-3')          | Product (bp) | Position (nt) <sup>a</sup> |
|--------|---------------------------|--------------|----------------------------|
| CPV-F1 | ATAGACCGTTACTGACATTCG     | 1022         | 205-1226                   |
| CPV-R1 | TCCTGGTTGTGCCATCATTTC     |              |                            |
| CPV-F2 | CCAGAAACCGTTGAAACCACAG    | 937          | 1044-1980                  |
| CPV-R2 | GTATTTTAGGCTCCGCCAGTT     |              |                            |
| CPV-F3 | GGGAAAAGTACCAGAATGGGATG   | 974          | 1934-2907                  |
| CPV-R3 | TAGAAATCCCCACACCCCAG      |              |                            |
| CPV-F4 | GCACCAATGAGTGATGGAGGAGT   | 1056         | 2778-3832                  |
| CPV-R4 | TGTGTAGACGCCTCAAAAGAATAAT |              |                            |
| CPV-F5 | GAACAGGTGATGAATTTGCTACAGG | 1209         | 3550-4758                  |
| CPV-R5 | CAACCACCCACACCATAAC       |              |                            |

<sup>a</sup> Oligonucleotide positions are referred to the genomic sequences of CPV-2c strain (accession number:MG013488)

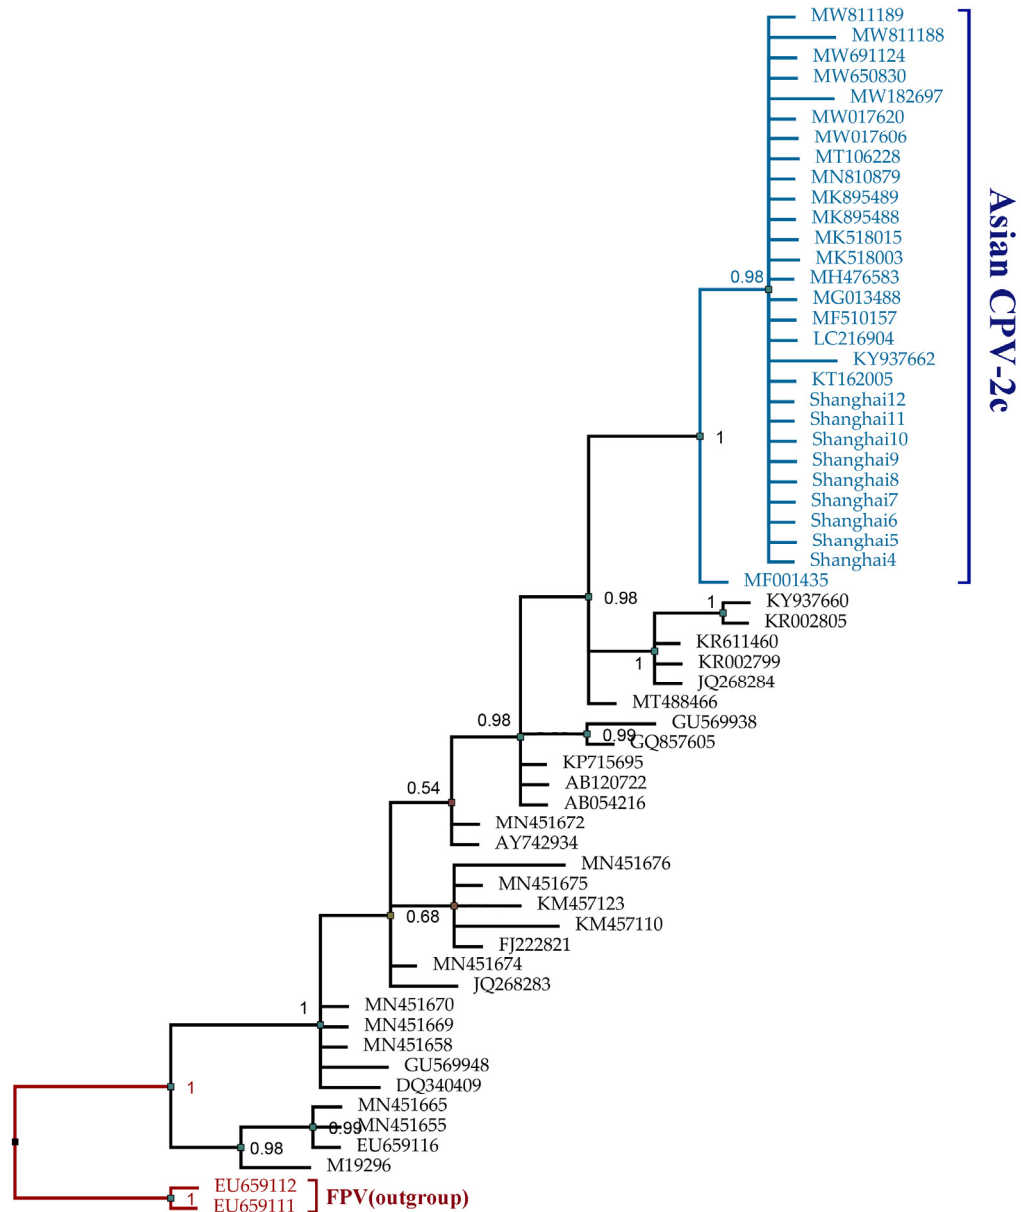

**Figure S1. The Bayesian phylogenetic tree inferred based on 60 VP2 sequences**

MrBayes v3.2.7 software was used to infer the phylogenetic tree on the model (JC69+G+I) with Markov chain Monte Carlo (MCMC) run for 1,300,000 generations, samplefreq and sump burnin set to 1000 and 325, respectively. The FigTree v1.4.4 software was used to display this Bayesian phylogenetic tree after the analysis. The Arabic numbers at the nodes on the graph represent supported by the percentage of Bayesian posterior probabilities (BPP).
